# Supplementary material for: Demonstration of relativistic electron beam focusing by a laser-plasma lens
Source: PubMed Central journal article supplement (PMC4410646; doi:10.1038/ncomms7860), 2015-04-16
Supplement: ncomms7860-s1.pdf [file ncomms7860-s1.pdf]

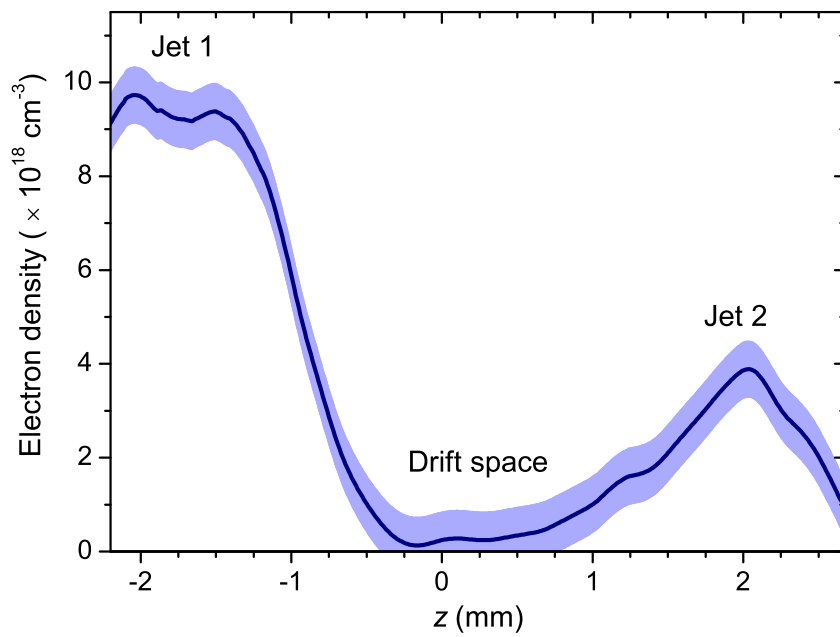

**Supplementary Figure 1 | Measured density profile** The density profile was measured from interferometry and Abel inversion. In this case, the gap between the two gas jets is  $L \approx 2.3$  mm (measured at half maximum). In the experiment the density of the first jet was constant, while the density of the second jet was tuned from 0 up to  $6.2 \pm 0.5 \times 10^{18} \text{ cm}^{-3}$ . The filled area indicates the uncertainty on the measurement.
